# Supplementary material
Source: publisher figshare collection journal article supplement (https://frontiersin.figshare.com/ndownloader/files/14036981)
Supplement: Supplementary file 1 [file 14036981]

Table S2. Size distributions (SL = standard length) of laboratory-raised Creek Chub.

| Population | Habitat type | Mean SL (cm) | St. Dev. | Range |
| --- | --- | --- | --- | --- |
| Mine Cr | Historically urban | 3.78 | 0.13 | 3.6 – 3.9 |
| Beaver Cr | Recently urbanized | 4.26 | 0.57 | 3.2 – 5.3 |
| Richland Cr | Recently urbanized | 4.25 | 0.26 | 3.8 – 4.7 |
| Rocky Cr | Rural | 4.81 | 0.38 | 4.1 – 5.5 |
